# Supplementary material for: Isolation and Identification of Ipomoea cairica (L.) Sweet Gene IcSRO1 Encoding a SIMILAR TO RCD-ONE Protein, Which Improves Salt and Drought Tolerance in Transgenic Arabidopsis
Source: PubMed Central journal article supplement (PMC7036886; doi:10.3390/ijms21031017), 2020-02-04
Supplement: ijms-21-01017-s001.pdf [file ijms-21-01017-s001.pdf]

**Table S1.** List of primer pairs used in this study

| Experiment                    | Name      | Primer sequence (5'-3')              |
|-------------------------------|-----------|--------------------------------------|
| Clone for ORF                 | orfRCD1F  | ATGGATGTAACTTAGGAAGGG                |
|                               | orfRCD1R  | TCAGTTTCCGGGCTCTGGTTTC               |
| Subcellular localization      | subRCD1F  | GGGCATATGATGGATGTAACTTAGGAAGGG       |
|                               | subRCD1R  | GGGGAATTCTCAGTTTCCGGGCTCTGGTTTC      |
| pGADT7-IcRCD1                 | ADRCD1F   | GGGCATATGATGGATGTAACTTAGGAAGGG       |
|                               | ADRCD1R   | GGGGAATTCTCAGTTTCCGGGCTCTGGTTTC      |
| pGBKT7- AtSOS1                | BDSOS1F   | GAGGCCGAATTCGCGGGGATGACGACTGTAATCGAC |
|                               | BDSOS1R   | TGCAGGTCGACGGATCCC TCATAGATCGTTCCTGA |
| Overexpression in Arabidopsis | overRCD1F | GGGCATATGATGGATGTAACTTAGGAAGGG       |
|                               | overRCD1R | GGGGAATTCTCAGTTTCCGGGCTCTGGTTTC      |
| Real time RT-PCR              | qACTINF   | GCGGATAGAATGAGCAAGGAA                |
|                               | qACTINR   | GGGCCGGAATCATCATACTC                 |
| Real time RT-PCR              | qRCD1F    | CCCATAATGACTCGGCACA                  |
|                               | qRCD1R    | TCTGAAGCAGGCTGAAATCG                 |
